# Supplementary material for: Screening for Organic Pollutants in the Black Sea Turbot (Scophthalmus maeoticus)
Source: MDPI journal article supplement (doi:10.3390/fishes8050265), 2023-05-17
Supplement: s1 [file s1]

Supplementary material for the paper

**Screening for Organic Pollutants in the Black Sea turbot (*Scophthalmus maeoticus*)**

Diana Danilov, Lorena Dediu, Nicoleta Damir, Valentina Coatu and Luminita Lazar

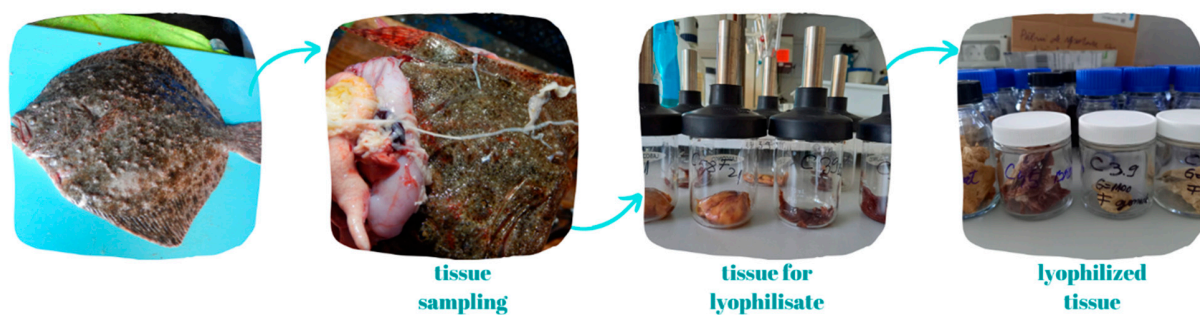

**Figure S1.** The lyophilization stages of turbot tissues

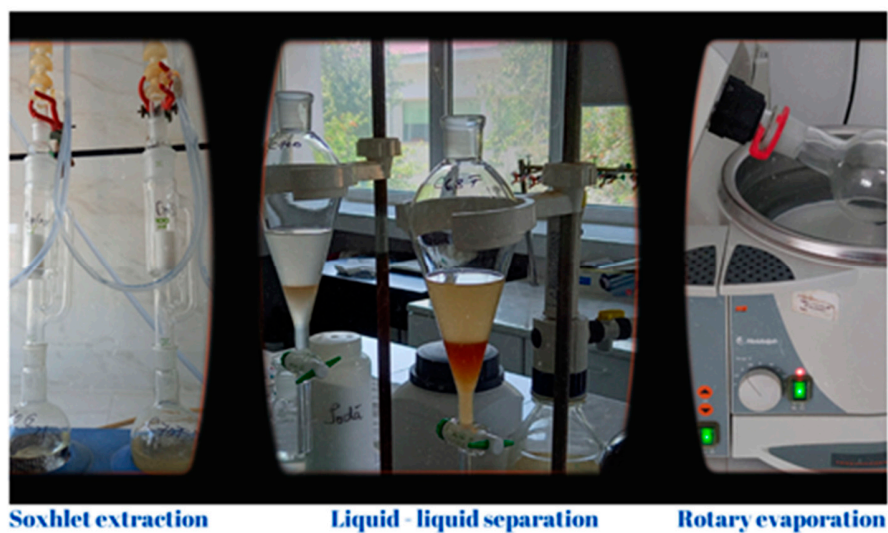

**Figure S2.** PAHs extraction steps.

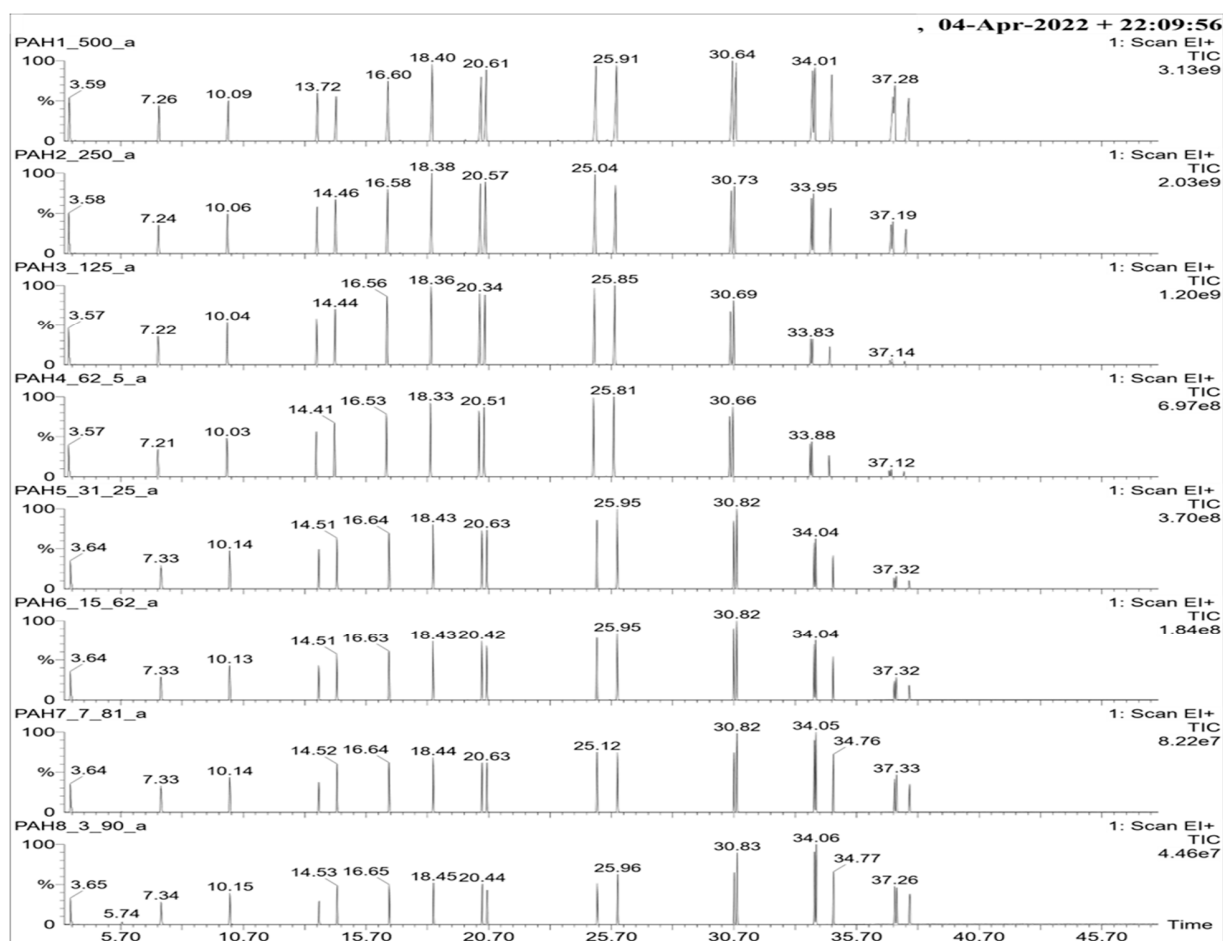

Figure S3. Standard solutions chromatogram of PAHs.

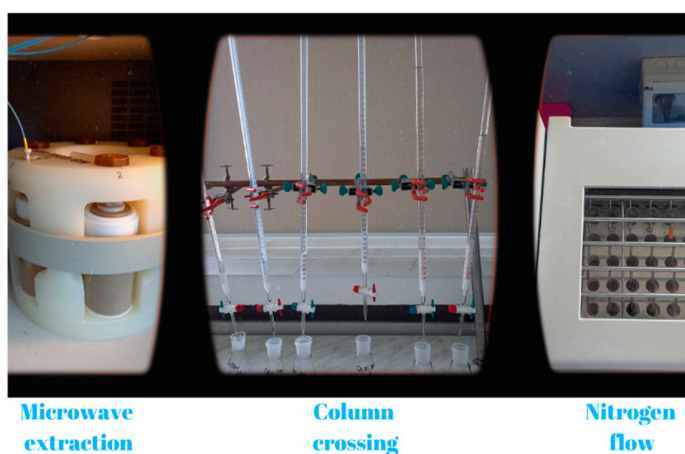

Figure S4. The stages of PCBs and OCPs extraction.

**Table S1.** ANOVA results for Water samples

Anova: Single Factor

| SUMMARY            |              |            |                |                 |
|--------------------|--------------|------------|----------------|-----------------|
| <i>Groups</i>      | <i>Count</i> | <i>Sum</i> | <i>Average</i> | <i>Variance</i> |
| S PAH water (µg/L) | 7            | 1.222303   | 0.174615       | 0.007969        |
| S OCP water (µg/L) | 7            | 111.3593   | 15.90848       | 54.75654        |
| S PCB water (µg/L) | 7            | 0.294714   | 0.042102       | 7.21E-05        |

| ANOVA                      |           |           |           |          |                |               |
|----------------------------|-----------|-----------|-----------|----------|----------------|---------------|
| <i>Source of Variation</i> | <i>SS</i> | <i>df</i> | <i>MS</i> | <i>F</i> | <i>P-value</i> | <i>F crit</i> |
| Between Groups             | 1165.065  | 2         | 582.5327  | 31.9111  | 1.21E-06       | 3.554557      |
| Within Groups              | 328.5875  | 18        | 18.25486  |          |                |               |
| Total                      | 1493.653  | 20        |           |          |                |               |

**Table S2.** ANOVA results for Sediment samples

Anova: Single Factor

| SUMMARY                |              |            |                |                 |
|------------------------|--------------|------------|----------------|-----------------|
| <i>Groups</i>          | <i>Count</i> | <i>Sum</i> | <i>Average</i> | <i>Variance</i> |
| S PAH sediments (µg/g) | 7            | 0.323621   | 0.046232       | 0.001151        |
| S OCP sediments (µg/g) | 7            | 3.030075   | 0.432868       | 0.692379        |
| S PCB sediments (µg/g) | 7            | 0.697275   | 0.099611       | 0.008356        |

| ANOVA                      |           |           |           |          |                |               |
|----------------------------|-----------|-----------|-----------|----------|----------------|---------------|
| <i>Source of Variation</i> | <i>SS</i> | <i>df</i> | <i>MS</i> | <i>F</i> | <i>P-value</i> | <i>F crit</i> |
| Between Groups             | 0.614594  | 2         | 0.307297  | 1.313449 | 0.293459       | 3.554557      |
| Within Groups              | 4.211312  | 18        | 0.233962  |          |                |               |
| Total                      | 4.825905  | 20        |           |          |                |               |

**Table S3.** Correlations coefficients between PAHs individual components in dry tissues and their content in seawater

| Variable                                              | Marked correlations are significant at $p < .05000$<br>N=7 |                                 |                                     |                                   |                                     |                               |                                           | Indeno(1,2,3-c,d)pyrene<br>( $\mu\text{g/L}$ ) |
|-------------------------------------------------------|------------------------------------------------------------|---------------------------------|-------------------------------------|-----------------------------------|-------------------------------------|-------------------------------|-------------------------------------------|------------------------------------------------|
|                                                       | Naphtalene<br>( $\mu\text{g/L}$ )                          | Fluorene<br>( $\mu\text{g/L}$ ) | Phenanthrene<br>( $\mu\text{g/L}$ ) | Anthracene<br>( $\mu\text{g/L}$ ) | Fluoranthene<br>( $\mu\text{g/L}$ ) | Pyrene<br>( $\mu\text{g/L}$ ) | Benzo[a]anthracene<br>( $\mu\text{g/L}$ ) |                                                |
| Naphtalene ( $\mu\text{g/g}$ dry tissue)              | 0.74                                                       | -0.35                           | 0.17                                | -0.35                             | 0.66                                | 0.66                          | 0.75                                      | 0.64                                           |
| Acenaphthylene ( $\mu\text{g/g}$ dry tissue)          | 0.31                                                       | -0.05                           | 0.17                                | -0.05                             | 0.22                                | 0.32                          | 0.30                                      | 0.31                                           |
| Acenaphthene ( $\mu\text{g/g}$ dry tissue)            | 0.42                                                       | -0.21                           | 0.09                                | -0.21                             | 0.38                                | 0.37                          | 0.42                                      | 0.36                                           |
| Fluorene ( $\mu\text{g/g}$ dry tissue)                | 0.00                                                       | 0.85                            | 0.86                                | 0.85                              | -0.52                               | 0.31                          | -0.11                                     | 0.37                                           |
| Phenanthrene ( $\mu\text{g/g}$ dry tissue)            | 0.48                                                       | -0.39                           | -0.05                               | -0.39                             | 0.53                                | 0.38                          | 0.51                                      | 0.35                                           |
| Anthracene ( $\mu\text{g/g}$ dry tissue)              | 0.67                                                       | -0.27                           | 0.20                                | -0.27                             | 0.57                                | 0.62                          | 0.67                                      | 0.60                                           |
| Fluoranthene ( $\mu\text{g/g}$ dry tissue)            | -0.34                                                      | 1.00                            | 0.77                                | 1.00                              | -0.82                               | 0.00                          | -0.45                                     | 0.07                                           |
| Pyrene ( $\mu\text{g/g}$ dry tissue)                  | -0.30                                                      | 0.99                            | 0.79                                | 0.99                              | -0.79                               | 0.04                          | -0.41                                     | 0.12                                           |
| Benzo[a]anthracene ( $\mu\text{g/g}$ dry tissue)      | -0.52                                                      | -0.16                           | -0.53                               | -0.16                             | -0.21                               | -0.62                         | -0.47                                     | -0.63                                          |
| Chrysene ( $\mu\text{g/g}$ dry tissue)                | 0.09                                                       | 0.55                            | 0.61                                | 0.55                              | -0.28                               | 0.30                          | 0.01                                      | 0.34                                           |
| Benzo[b]fluoranthene ( $\mu\text{g/g}$ dry tissue)    | -0.47                                                      | -0.12                           | -0.45                               | -0.12                             | -0.21                               | -0.55                         | -0.43                                     | -0.56                                          |
| Benzo[k]fluoranthene ( $\mu\text{g/g}$ dry tissue)    | -0.49                                                      | -0.13                           | -0.48                               | -0.13                             | -0.21                               | -0.57                         | -0.45                                     | -0.58                                          |
| Benzo[a]pyrene ( $\mu\text{g/g}$ dry tissue)          | 0.41                                                       | 0.28                            | 0.58                                | 0.28                              | 0.08                                | 0.55                          | 0.36                                      | 0.57                                           |
| Benzo (g,h,i)perylene ( $\mu\text{g/g}$ dry tissue)   | -0.50                                                      | -0.07                           | -0.42                               | -0.07                             | -0.26                               | -0.56                         | -0.46                                     | -0.57                                          |
| Dibenzo(a,h)anthracene ( $\mu\text{g/g}$ dry tissue)  | 0.16                                                       | 0.55                            | 0.67                                | 0.55                              | -0.24                               | 0.38                          | 0.08                                      | 0.42                                           |
| Indeno(1,2,3-c,d)pyrene ( $\mu\text{g/g}$ dry tissue) | -0.49                                                      | -0.10                           | -0.45                               | -0.10                             | -0.23                               | -0.56                         | -0.45                                     | -0.57                                          |

**Table S4.** Correlations coefficients between PAHs individual components in dry tissues and their content in sediments

| Variable                                              | Marked correlations are significant at $p < .05000$<br>N=7 |                                 |                                     |                                     |                               |                                           |                                 |                                             |                                       |                                                    |
|-------------------------------------------------------|------------------------------------------------------------|---------------------------------|-------------------------------------|-------------------------------------|-------------------------------|-------------------------------------------|---------------------------------|---------------------------------------------|---------------------------------------|----------------------------------------------------|
|                                                       | Naphtalene<br>( $\mu\text{g/g}$ )                          | Fluorene<br>( $\mu\text{g/g}$ ) | Phenanthrene<br>( $\mu\text{g/g}$ ) | Fluoranthene<br>( $\mu\text{g/g}$ ) | Pyrene<br>( $\mu\text{g/g}$ ) | Benzo[a]anthracene<br>( $\mu\text{g/g}$ ) | Chrysene<br>( $\mu\text{g/g}$ ) | Benzo[b]fluoranthene<br>( $\mu\text{g/g}$ ) | Benzo[a]pyrene<br>( $\mu\text{g/g}$ ) | Indeno(1,2,3-<br>c,d)pyrene<br>( $\mu\text{g/g}$ ) |
| Naphtalene ( $\mu\text{g/g}$ dry tissue)              | 0.55                                                       | 0.69                            | 0.75                                | 0.75                                | 0.75                          | 0.50                                      | 0.75                            | 0.59                                        | 0.67                                  | 0.75                                               |
| Acenaphthylene ( $\mu\text{g/g}$ dry tissue)          | 0.15                                                       | 0.24                            | 0.30                                | 0.30                                | 0.30                          | 0.28                                      | 0.30                            | 0.30                                        | 0.32                                  | 0.30                                               |
| Acenaphthene ( $\mu\text{g/g}$ dry tissue)            | 0.32                                                       | 0.39                            | 0.42                                | 0.42                                | 0.42                          | 0.28                                      | 0.42                            | 0.33                                        | 0.38                                  | 0.42                                               |
| Fluorene ( $\mu\text{g/g}$ dry tissue)                | -0.70                                                      | -0.45                           | -0.11                               | -0.11                               | -0.11                         | 0.60                                      | -0.11                           | 0.47                                        | 0.30                                  | -0.11                                              |
| Phenanthrene ( $\mu\text{g/g}$ dry tissue)            | 0.49                                                       | 0.53                            | 0.51                                | 0.51                                | 0.51                          | 0.21                                      | 0.51                            | 0.30                                        | 0.38                                  | 0.51                                               |
| Anthracene ( $\mu\text{g/g}$ dry tissue)              | 0.46                                                       | 0.60                            | 0.67                                | 0.67                                | 0.67                          | 0.48                                      | 0.67                            | 0.56                                        | 0.62                                  | 0.67                                               |
| Fluoranthene ( $\mu\text{g/g}$ dry tissue)            | -0.94                                                      | -0.76                           | -0.45                               | -0.45                               | -0.45                         | 0.36                                      | -0.45                           | 0.20                                        | -0.01                                 | -0.45                                              |
| Pyrene ( $\mu\text{g/g}$ dry tissue)                  | -0.92                                                      | -0.73                           | -0.41                               | -0.41                               | -0.41                         | 0.40                                      | -0.41                           | 0.24                                        | 0.03                                  | -0.41                                              |
| Benzo[a]anthracene ( $\mu\text{g/g}$ dry tissue)      | -0.05                                                      | -0.27                           | -0.47                               | -0.47                               | -0.47                         | -0.64                                     | -0.47                           | -0.64                                       | -0.62                                 | -0.47                                              |
| Chrysene ( $\mu\text{g/g}$ dry tissue)                | -0.42                                                      | -0.23                           | 0.01                                | 0.01                                | 0.01                          | 0.48                                      | 0.01                            | 0.40                                        | 0.29                                  | 0.01                                               |
| Benzo[b]fluoranthene ( $\mu\text{g/g}$ dry tissue)    | -0.07                                                      | -0.26                           | -0.43                               | -0.43                               | -0.43                         | -0.56                                     | -0.43                           | -0.56                                       | -0.55                                 | -0.43                                              |
| Benzo[k]fluoranthene ( $\mu\text{g/g}$ dry tissue)    | -0.06                                                      | -0.26                           | -0.45                               | -0.45                               | -0.45                         | -0.59                                     | -0.45                           | -0.59                                       | -0.57                                 | -0.45                                              |
| Benzo[a]pyrene ( $\mu\text{g/g}$ dry tissue)          | -0.08                                                      | 0.13                            | 0.36                                | 0.36                                | 0.36                          | 0.62                                      | 0.36                            | 0.59                                        | 0.54                                  | 0.36                                               |
| Benzo (g,h,i)perylene ( $\mu\text{g/g}$ dry tissue)   | -0.12                                                      | -0.30                           | -0.46                               | -0.46                               | -0.46                         | -0.55                                     | -0.46                           | -0.57                                       | -0.56                                 | -0.46                                              |
| Dibenzo(a,h)anthracene ( $\mu\text{g/g}$ dry tissue)  | -0.40                                                      | -0.18                           | 0.08                                | 0.08                                | 0.08                          | 0.56                                      | 0.08                            | 0.48                                        | 0.37                                  | 0.08                                               |
| Indeno(1,2,3-c,d)pyrene ( $\mu\text{g/g}$ dry tissue) | -0.09                                                      | -0.28                           | -0.45                               | -0.45                               | -0.45                         | -0.57                                     | -0.45                           | -0.58                                       | -0.56                                 | -0.45                                              |

**Table S5.** Correlations coefficients between OCPs individual components in dry tissues and their content in seawater

| Variable                                | Marked correlations are significant at $p < .05000$<br>N=7 |                               |                               |                                |                                 |                               |                                |                                |
|-----------------------------------------|------------------------------------------------------------|-------------------------------|-------------------------------|--------------------------------|---------------------------------|-------------------------------|--------------------------------|--------------------------------|
|                                         | HCB<br>( $\mu\text{g/L}$ )                                 | Lindan<br>( $\mu\text{g/L}$ ) | Aldrin<br>( $\mu\text{g/L}$ ) | p,p'DDE<br>( $\mu\text{g/L}$ ) | Dieldrin<br>( $\mu\text{g/L}$ ) | Endrin<br>( $\mu\text{g/L}$ ) | p,p'DDD<br>( $\mu\text{g/L}$ ) | p,p'DDT<br>( $\mu\text{g/L}$ ) |
| HCB ( $\mu\text{g/g}$ dry tissue)       | -0.41                                                      | -0.16                         | -0.06                         | 0.44                           | -0.28                           | -0.31                         | -0.16                          | -0.45                          |
| Lindan ( $\mu\text{g/g}$ dry tissue)    | -0.42                                                      | -0.33                         | -0.22                         | 0.56                           | -0.45                           | -0.26                         | -0.33                          | -0.56                          |
| Heptaclor ( $\mu\text{g/g}$ dry tissue) | -0.48                                                      | 0.03                          | 0.14                          | 0.37                           | -0.12                           | -0.44                         | 0.02                           | -0.40                          |
| Aldrin ( $\mu\text{g/g}$ dry tissue)    | -0.52                                                      | -0.24                         | -0.11                         | 0.58                           | -0.39                           | -0.37                         | -0.24                          | -0.59                          |
| p,p'DDE ( $\mu\text{g/g}$ dry tissue)   | -0.43                                                      | 0.91                          | 0.97                          | -0.25                          | 0.76                            | -0.73                         | 0.91                           | 0.13                           |
| Dieldrin ( $\mu\text{g/g}$ dry tissue)  | -0.38                                                      | 0.69                          | 0.75                          | -0.14                          | 0.56                            | -0.60                         | 0.69                           | 0.05                           |
| Endrin ( $\mu\text{g/g}$ dry tissue)    | -0.01                                                      | -0.24                         | -0.23                         | 0.17                           | -0.24                           | 0.09                          | -0.25                          | -0.14                          |
| p,p'DDD ( $\mu\text{g/g}$ dry tissue)   | -0.50                                                      | -0.26                         | -0.13                         | 0.57                           | -0.40                           | -0.35                         | -0.26                          | -0.58                          |
| p,p'DDT ( $\mu\text{g/g}$ dry tissue)   | -0.21                                                      | 0.99                          | 1.00                          | -0.47                          | 0.90                            | -0.57                         | 0.99                           | 0.37                           |

**Table S6.** Correlations coefficients between OCPs individual components in dry tissues and their content in sediments

| Variable                                | Marked correlations are significant at $p < .05000$<br>N=7 |                               |                               |                                 |                               |                                |
|-----------------------------------------|------------------------------------------------------------|-------------------------------|-------------------------------|---------------------------------|-------------------------------|--------------------------------|
|                                         | HCB<br>( $\mu\text{g/g}$ )                                 | Lindan<br>( $\mu\text{g/g}$ ) | Aldrin<br>( $\mu\text{g/g}$ ) | Dieldrin<br>( $\mu\text{g/g}$ ) | Endrin<br>( $\mu\text{g/g}$ ) | p,p'DDD<br>( $\mu\text{g/g}$ ) |
| HCB ( $\mu\text{g/g}$ dry tissue)       | 0.21                                                       | -0.10                         | -0.10                         | -0.10                           | -0.06                         | -0.40                          |
| Lindan ( $\mu\text{g/g}$ dry tissue)    | 0.12                                                       | -0.26                         | -0.26                         | -0.26                           | -0.22                         | -0.41                          |
| Heptaclor ( $\mu\text{g/g}$ dry tissue) | 0.37                                                       | 0.09                          | 0.09                          | 0.09                            | 0.13                          | -0.48                          |
| Aldrin ( $\mu\text{g/g}$ dry tissue)    | 0.24                                                       | -0.16                         | -0.16                         | -0.16                           | -0.11                         | -0.51                          |
| p,p'DDE ( $\mu\text{g/g}$ dry tissue)   | 0.87                                                       | 0.95                          | 0.95                          | 0.95                            | 0.96                          | -0.46                          |
| Dieldrin ( $\mu\text{g/g}$ dry tissue)  | 0.71                                                       | 0.73                          | 0.73                          | 0.73                            | 0.75                          | -0.41                          |
| Endrin ( $\mu\text{g/g}$ dry tissue)    | -0.14                                                      | -0.24                         | -0.24                         | -0.24                           | -0.23                         | 0.00                           |
| p,p'DDD ( $\mu\text{g/g}$ dry tissue)   | 0.22                                                       | -0.18                         | -0.18                         | -0.18                           | -0.13                         | -0.49                          |
| p,p'DDT ( $\mu\text{g/g}$ dry tissue)   | 0.76                                                       | 1.00                          | 1.00                          | 1.00                            | 1.00                          | -0.26                          |

**Table S7.** Correlations coefficients between PCBs individual components in dry tissues and their content in seawater

| Variable                             | Marked correlations are significant at $p < .05000$<br>N=7 |                               |                               |                               |                               |
|--------------------------------------|------------------------------------------------------------|-------------------------------|-------------------------------|-------------------------------|-------------------------------|
|                                      | PCB52<br>( $\mu\text{g/L}$ )                               | PCB101<br>( $\mu\text{g/L}$ ) | PCB118<br>( $\mu\text{g/L}$ ) | PCB153<br>( $\mu\text{g/L}$ ) | PCB180<br>( $\mu\text{g/L}$ ) |
| PCB28 ( $\mu\text{g/g}$ dry tissue)  | -0.30                                                      | 0.25                          | 0.52                          | 0.30                          | 0.48                          |
| PCB52 ( $\mu\text{g/g}$ dry tissue)  | -0.46                                                      | 0.18                          | 0.64                          | 0.46                          | 0.62                          |
| PCB101 ( $\mu\text{g/g}$ dry tissue) | -0.48                                                      | 0.18                          | 0.66                          | 0.48                          | 0.64                          |
| PCB118 ( $\mu\text{g/g}$ dry tissue) | -0.50                                                      | 0.20                          | 0.70                          | 0.50                          | 0.68                          |
| PCB153 ( $\mu\text{g/g}$ dry tissue) | -0.36                                                      | 0.41                          | 0.71                          | 0.36                          | 0.64                          |
| PCB138 ( $\mu\text{g/g}$ dry tissue) | -0.49                                                      | 0.17                          | 0.68                          | 0.49                          | 0.66                          |
| PCB180 ( $\mu\text{g/g}$ dry tissue) | -0.31                                                      | 0.28                          | 0.55                          | 0.31                          | 0.51                          |

**Table S8.** Correlations coefficients between PCBs individual components in dry tissues and their content in sediments

| Variable                             | Marked correlations are significant at $p < .05000$<br>N=7 |                              |                               |                               |
|--------------------------------------|------------------------------------------------------------|------------------------------|-------------------------------|-------------------------------|
|                                      | PCB28<br>( $\mu\text{g/g}$ )                               | PCB52<br>( $\mu\text{g/g}$ ) | PCB101<br>( $\mu\text{g/g}$ ) | PCB138<br>( $\mu\text{g/g}$ ) |
| PCB28 ( $\mu\text{g/g}$ dry tissue)  | -0.33                                                      | -0.36                        | -0.25                         | -0.25                         |
| PCB52 ( $\mu\text{g/g}$ dry tissue)  | -0.29                                                      | -0.34                        | -0.18                         | -0.18                         |
| PCB101 ( $\mu\text{g/g}$ dry tissue) | -0.29                                                      | -0.34                        | -0.18                         | -0.18                         |
| PCB118 ( $\mu\text{g/g}$ dry tissue) | -0.33                                                      | -0.38                        | -0.20                         | -0.20                         |
| PCB153 ( $\mu\text{g/g}$ dry tissue) | -0.52                                                      | -0.56                        | -0.41                         | -0.41                         |
| PCB138 ( $\mu\text{g/g}$ dry tissue) | -0.29                                                      | -0.35                        | -0.17                         | -0.17                         |
| PCB180 ( $\mu\text{g/g}$ dry tissue) | -0.36                                                      | -0.40                        | -0.28                         | -0.28                         |



Table S9. ANOVA results for the total content of OPs in turbot tissues samples

Anova: Single Factor

SUMMARY

| <i>Groups</i>           | <i>Count</i> | <i>Sum</i> | <i>Average</i> | <i>Variance</i> |
|-------------------------|--------------|------------|----------------|-----------------|
| S PAH (µg/g dry tissue) | 7            | 1311.501   | 187.3573       | 60100.69        |
| S OCP (µg/g dry tissue) | 7            | 4219.423   | 602.7747       | 456537          |
| S PCB (µg/g dry tissue) | 7            | 363.3689   | 51.90984       | 14513.78        |

ANOVA

| <i>Source of Variation</i> | <i>SS</i> | <i>df</i> | <i>MS</i> | <i>F</i> | <i>P-value</i> | <i>F crit</i> |
|----------------------------|-----------|-----------|-----------|----------|----------------|---------------|
| Between Groups             | 1153529   | 2         | 576764.6  | 3.257628 | 0.062019       | 3.554557      |
| Within Groups              | 3186909   | 18        | 177050.5  |          |                |               |
| Total                      | 4340438   | 20        |           |          |                |               |
